# Supplementary material
Source: PubMed Central journal article supplement (PMC3433720)

**Figure S1**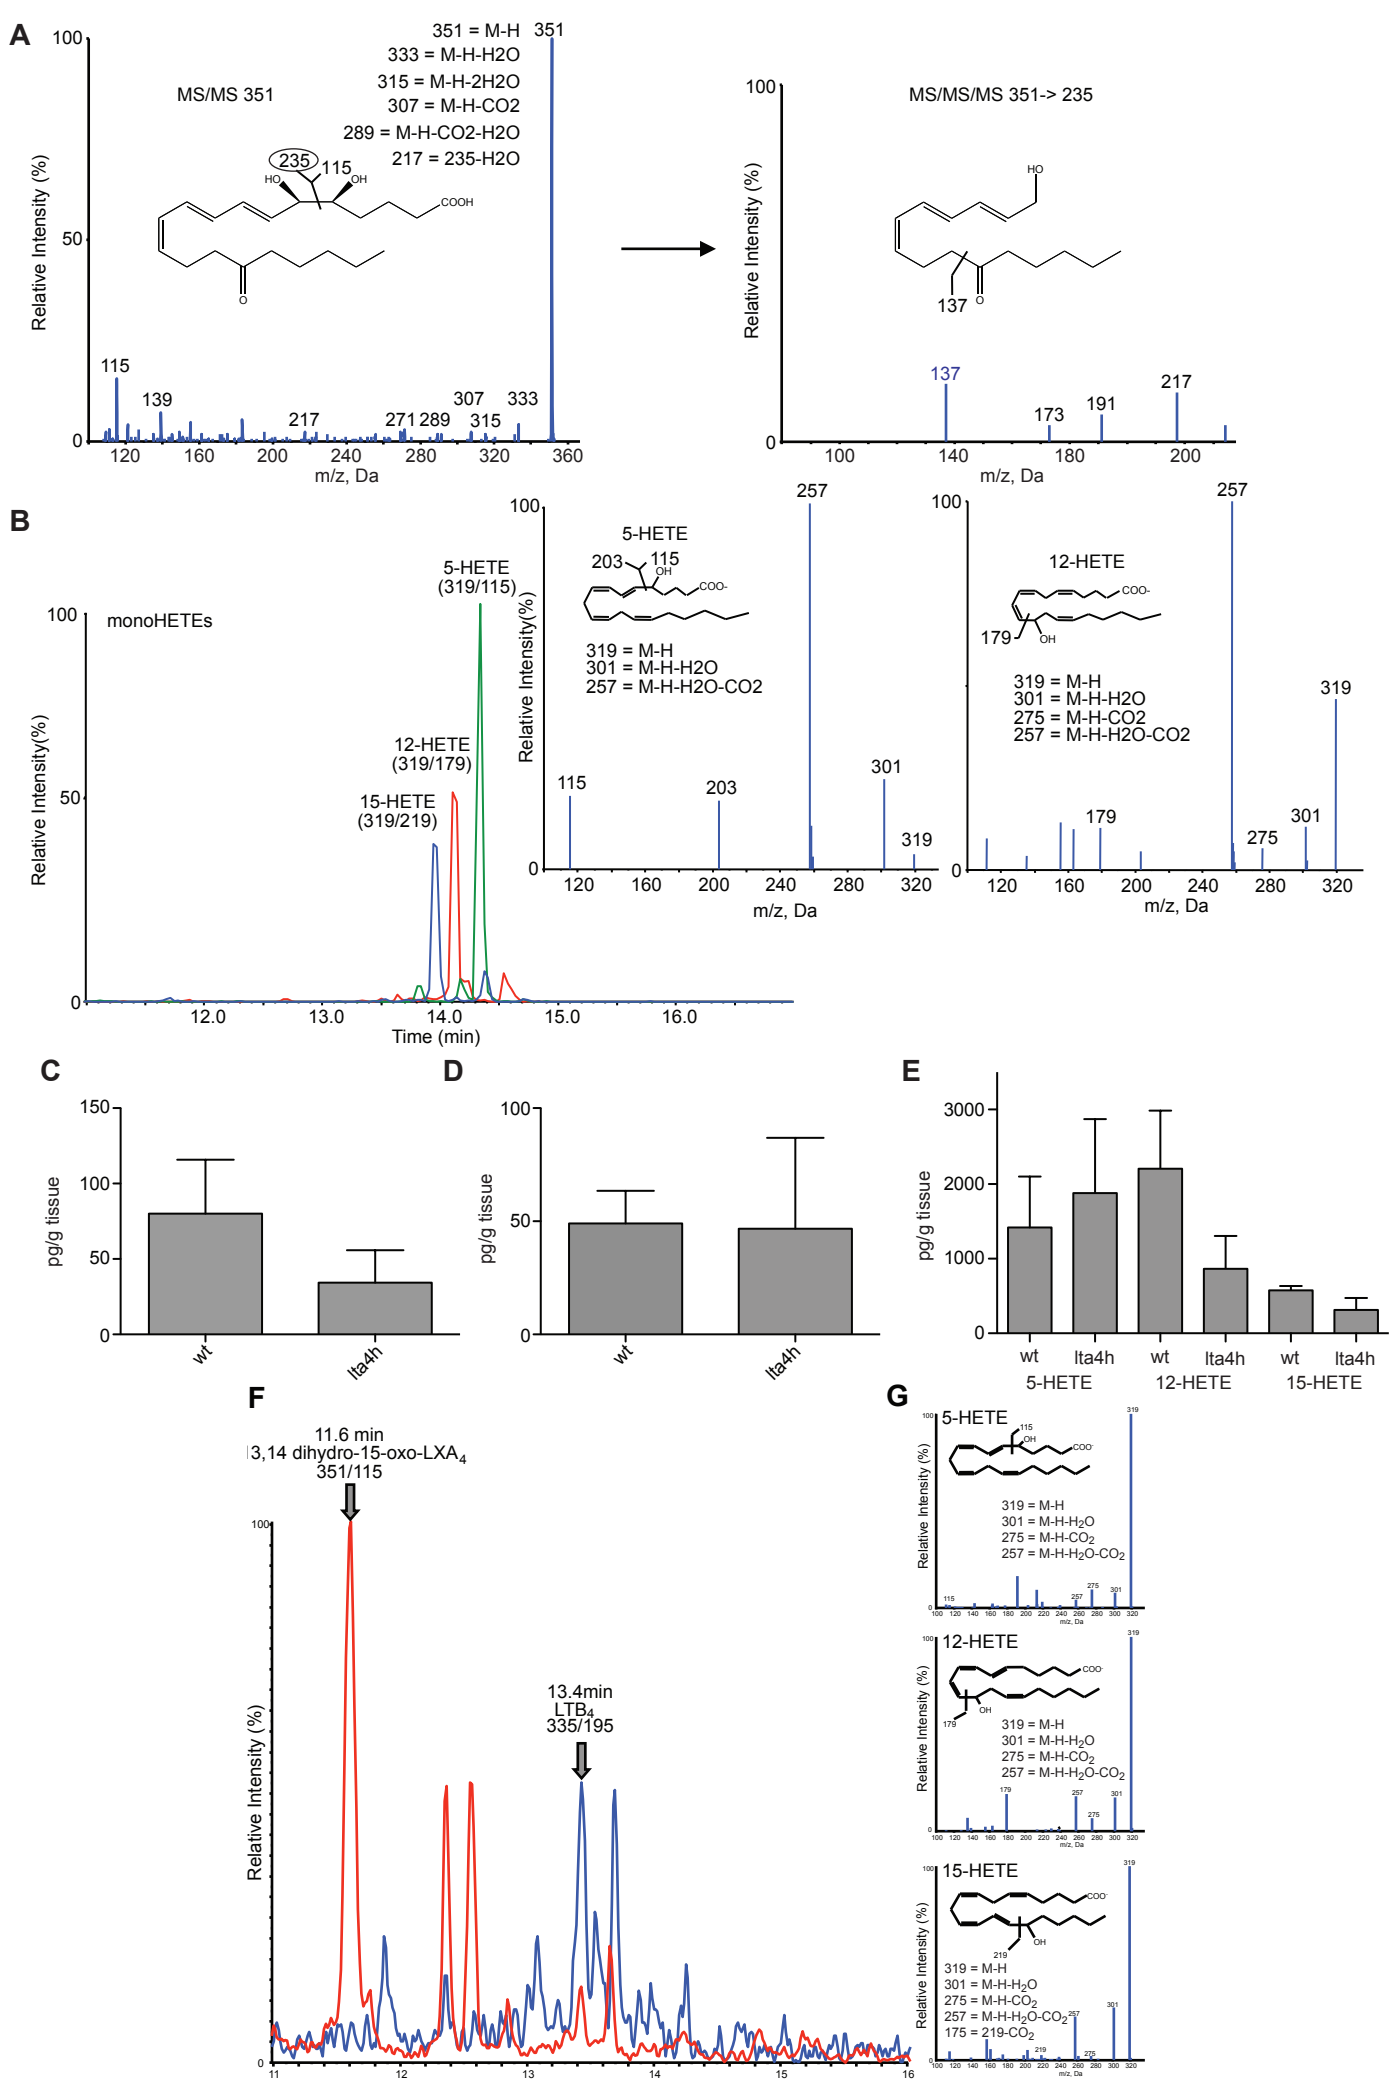

Figure S2

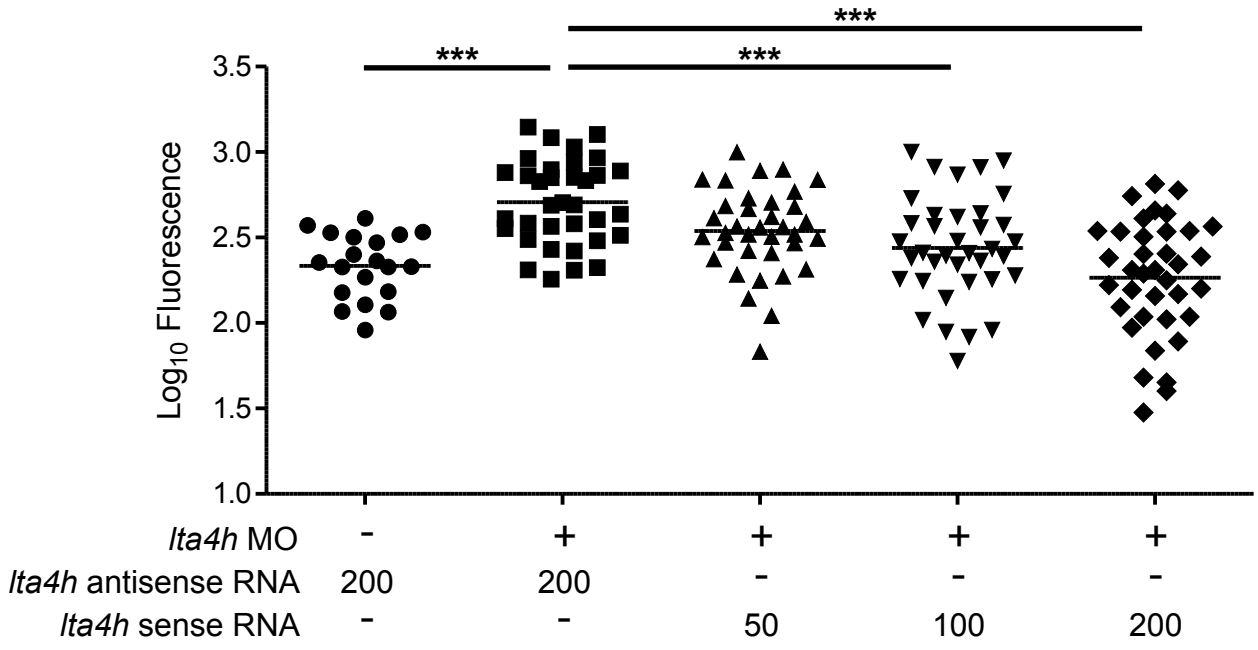

Figure S3

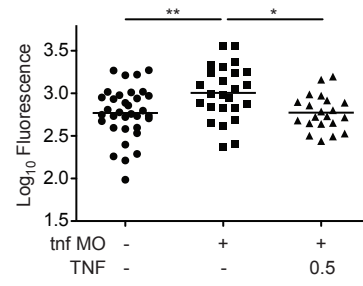

Figure S4

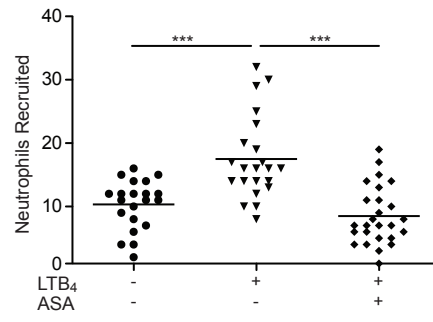

Figure S5

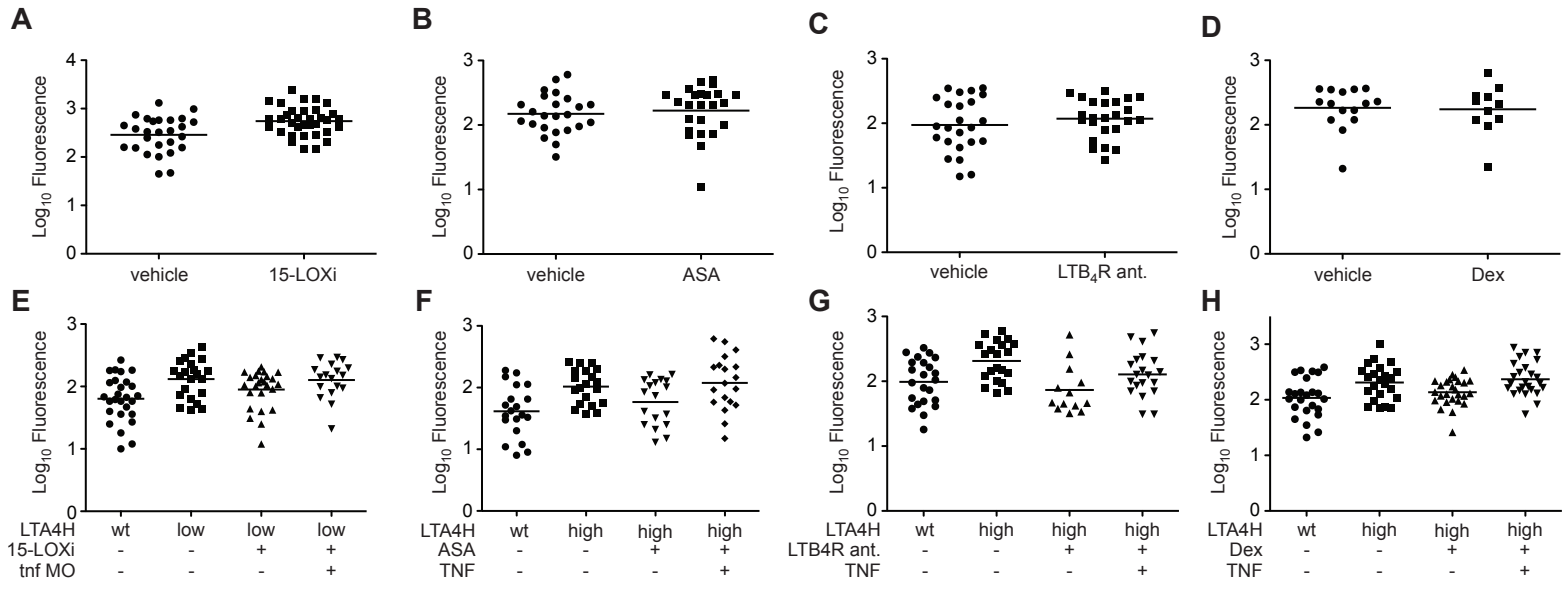

Figure S6

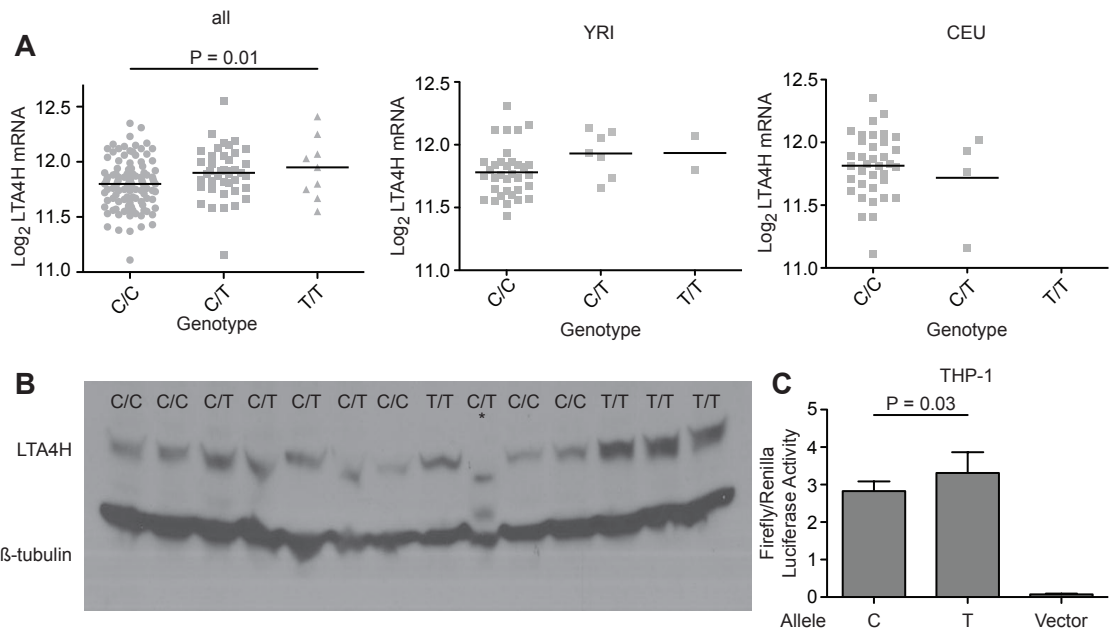

Figure S7

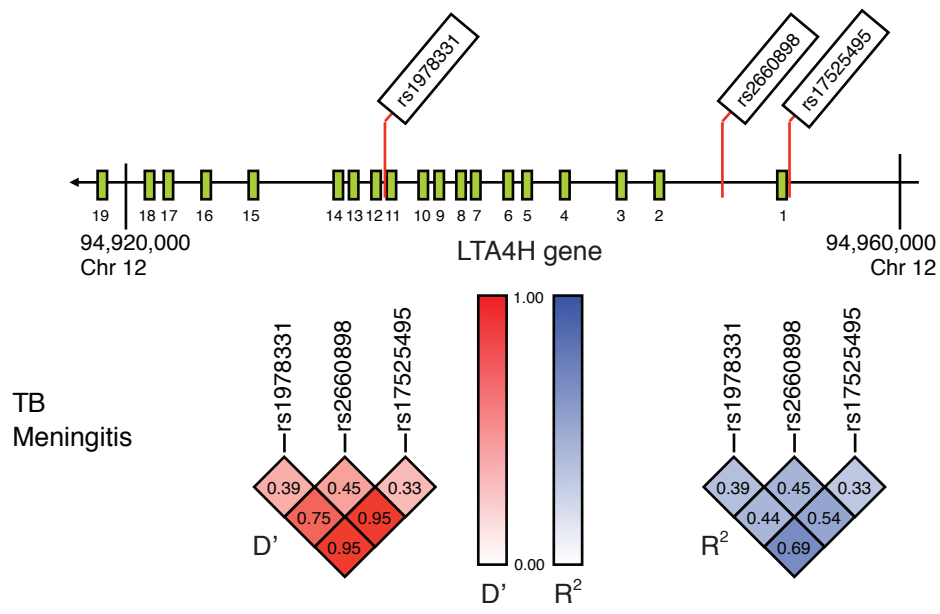

Supplement: NIHMS348508-supplement-02.pdf [file NIHMS348508-supplement-02.pdf]
